# Supplementary material for: Heavy Metals Accumulation in Tissues of Wild and Farmed Barramundi from the Northern Bay of Bengal Coast, and Its Estimated Human Health Risks
Source: MDPI journal article supplement (doi:10.3390/toxics10080410), 2022-07-22
Supplement: s1 [file s1]

# Supplementary Materials: Heavy Metals Accumulation in Tissues of Wild and Farmed Barramundi from the Northern Bay of Bengal Coast, and Its Estimated Human Health Risks

Tanha Tahity, Md. Rakeb Ul Islam, Nurur Zaman Bhuiyan, Tasrina Rabia Choudhury, Jimmy Yu, Md. Abu Noman, Mohammad Mozammel Hosen, Shamshad B. Quraishi, Bilal Ahamad Paray, Takaomi Arai and Mohammad Belal Hossain

**Table S1.** Spectral lines used in emission measurements and the instrumental detection limit for the elements measured by using AAS.

| Elements | Wavelengths (nm) | Instrumental detection limit (mg/L) |
|----------|------------------|-------------------------------------|
| Hg       | 253.7            |                                     |
| As       | 193.7            |                                     |
| Pb       | 217.0            | 0.013                               |
| Cr       | 357.9            | 0.0054                              |
| Cd       | 228.8            | 0.0028                              |
| Mn       | 279.5            | 0.0016                              |
| Cu       | 324.8            | 0.004                               |
| Zn       | 213.9            | 0.0033                              |
